# Supplementary material for: Characterization of MicroRNA Expression Levels and Their Biological Correlates in Human Cancer Cell Lines
Source: Oxford University Press journal article supplement (doi:10.1158/0008-5472.can-06-2698), 2007-03-15
Supplement: 00085472can062698-sup-supplementary_table4.xls [file 00085472can062698-sup-supplementary_table4.xls]

## Sheet: Sheet1
Supplementary Table 4a: microRNA expression level and copy number changes in the DNA encoding the core set of 81 microRNAs that define the four highly significant clusters of tumor cell lines derived from hematological, colon, melanoma and CNS tissues
SF-268 (CNS)				SF-295 (CNS)				SF-539 (CNS)				SNB-19 (CNS)					SNB-75 (CNS)					U251 (CNS)						CCRF-CEM (Hema)					HL-60(TB) (Hema)					K-562 (Hema)					MOLT-4 (Hema)					RPMI-8226 (Hema)
microRNA	SNP copy# at mir location 1	RNA copy # of mir 2		microRNA	SNP copy# at mir location	RNA copy # of mir		microRNA	SNP copy# at mir location	RNA copy # of mir		microRNA	SNP copy# at mir location	RNA copy # of mir	RNA copy#/SNP copy#		microRNA	SNP copy# at mir location	RNA copy # of mir	RNA copy#/SNP copy#		microRNA	SNP copy# at mir location	RNA copy # of mir	RNA copy#/SNP copy#			microRNA	SNP copy# at mir location	RNA copy # of mir	RNA copy#/SNP copy#		microRNA	SNP copy# at mir location	RNA copy # of mir	RNA copy#/SNP copy#		microRNA	SNP copy# at mir location	RNA copy # of mir	RNA copy#/SNP copy#		microRNA	SNP copy# at mir location	RNA copy # of mir	RNA copy#/SNP copy#		microRNA	SNP copy# at mir location
miR-125b	1.895	5186		miR-125b	1.71	4258		miR-125b	0.83	1913		miR-125b	0.92	6165	6701.09		miR-125b	0.515	1119	2172.82		miR-125b	0.825	2274	2756.36			miR-142-3p	3.015	13845	4592.04		miR-92	4.85	66439	13698.8		miR-92	7.035	91548	13013.2		miR-19b	2.215	9355	4223.48		miR-92	1.5
miR-100	2.245	3162		miR-100	2.15	3661		miR-92	4.825	1668.86		miR-92	2.625	4541.49	1730.09		miR-19b	1.275	931.914	730.913		miR-23bN	0.84	1618	1926.19			miR-96	1.53	11352	7419.61		miR-142-3p	3.39	53912	15903.2		miR-20	7.035	77582	11028		miR-92N	2.215	7989	3606.77		miR-20	1.5
miR-99a	2.05	2657		miR-99a	2.22	3182		miR-20	4.825	1469.38		miR-20	2.625	3559.55	1356.02		miR-92	1.275	783.924	614.842		miR-92	1.67	1482.29	887.6			miR-183	1.53	7938	5188.24		miR-20	4.85	45786	9440.41		miR-19b	7.035	41581	5910.59		miR-19a	2.215	6492	2930.93		miR-92N	1.5
miR-19b	0.825	1958.98		miR-92	2.72	1221		miR-100	1.55	1265		miR-100	1.76	3358	1907.95		miR-100	1.065	756	709.859		miR-99a	1.765	1351	765.439			miR-182	1.53	6118	3998.69		miR-92N	4.85	28531	5882.68		miR-92N	7.035	41154	5849.89		miR-20N	2.215	2954	1333.63		miR-19b	1.5
miR-92	0.825	1751.52		miR-23bN	1.22	1156		miR-19b	4.825	1217.4		miR-19b	2.625	3181.16	1211.87		miR-20	1.275	678.182	531.907		miR-100	1.645	1328	807.295			miR-302a	1.915	3142	1640.73		miR-19b	4.85	21339	4399.79		miR-19a	7.035	37613	5346.55		miR-142-5p	3.705	1195	322.537		miR-19a	1.5
miR-19a	0.825	1714.45		miR-20	2.72	818		miR-99a	2.02	1174		miR-99a	1.665	3131	1880.48		miR-19a	1.275	639.218	501.347		miR-19b	1.67	1317.18	788.73			miR-218	2.06	2251	1092.72		miR-19a	4.85	13111	2703.3		miR-20N	7.035	18648	2650.75		miR-106a	1.47	1127	766.667		miR-142-3p	3.03
miR-20	0.825	1668.34		miR-31	0.77	779		miR-92N	4.825	1139.94		miR-92N	2.625	2211.96	842.652		miR-99a	2.56	585	228.516		miR-135b	2.445	1147	469.121			miR-34a,	0.97	1138	1173.2		miR-20N	4.85	9947	2050.93		miR-142-3p	2.31	11275	4880.95		miR-17-5p	2.215	874	394.582		miR-20N	1.5
miR-92N	0.825	931.225		miR-19b	2.72	728.499		miR-23bN	0.755	1135		miR-23bN	1.1	2148	1952.73		miR-23bN	1.01	549	543.564		miR-19a	1.67	956.611	572.821			miR-106a	2.615	886.957	339.18		miR-142-5p	3.39	3422	1009		miR-17-5p	7.035	4311	612.793		miR-342	2.06	627	304.369		miR-30a-3p	3.06
miR-23bN	1.105	628		miR-92N	2.72	651.45		miR-19a	4.825	789.976		miR-19a	2.625	1911.52	728.199		miR-92N	1.275	474.184	371.909		miR-20	1.67	884.131	529.42			miR-17-5p	2.45	779	317.959		miR-30a-3p	2.19	2947.88	1346.06		miR-106a	1.98	3627	1831.82		miR-30a-3p	1.37	473	345.4		miR-148a	1.905
miR-20N	0.825	459.862		miR-146	2.085	457		miR-27b	0.755	427		miR-30a-3p	1.84	1525.51	829.082		miR-27b	1.01	363	359.406		miR-92N	1.67	864.887	517.896			miR-142-5p	3.015	762	252.736		miR-148a	1.73	2248	1299.42		miR-18	7.035	2611	371.144		miR-148a	1.805	394	218.283		miR-17-5p	1.5
miR-30a-3p	2.22	373.008		miR-27b	1.22	432		miR-31	2.54	417		miR-27b	1.1	737	670		miR-146	1.975	232	117.468		miR-27b	0.84	864	1028.57			miR-30a-3p	1.455	543.786	373.736		miR-17-5p	4.85	1958	403.711		miR-30a-3p	1.69	794.069	469.863		miR-192	2.47	322	130.364		miR-125b	0.94
miR-27b	1.105	321		miR-19a	2.72	365		miR-20N	4.825	215.445		miR-20N	2.625	684.531	260.774		miR-30a-3p	1.97	210.324	106.764		miR-30a-3p	1.9	368.448	193.92			miR-18	2.45	243	99.1837		miR-106a	2.15	1911	888.837		miR-182	1.55	762	491.613		miR-18	2.215	224	101.129		miR-106a	2.05
miR-137	2.695	244		miR-20N	2.72	171.991		miR-30a-3p	2.255	213.336		miR-10b	2.905	551	189.673		miR-20N	1.275	191.591	150.268		miR-31	2.455	291	118.534			miR-146	1.785	161	90.1961		miR-422b	2.67	645	241.573		miR-142-5p	2.31	696	301.299		miR-194	1.695	176	103.835		miR-100	1.47
miR-335	2.595	215		miR-30a-3p	1.92	126.423		miR-17-5p	4.825	178.651		miR-135b	2.095	421	200.955		miR-17-5p	1.275	117.115	91.8548		miR-20N	1.67	241.148	144.4			miR-148a	1.39	159	114.388		miR-18	4.85	554	114.227		miR-422b	2.39	437	182.845		miR-182	0.895	111	124.022		miR-99a	1.745
miR-342	3.685	191		miR-106a	4.065	74		miR-10b	2.32	155		miR-182	1.055	392.746	372.271		miR-106a	2.025	117	57.7778		miR-182	1.035	236.783	228.776			miR-326	2.15	119	55.3488		miR-146	2.465	494	200.406		miR-378	2.39	295	123.431		miR-422b	1.975	88	44.557		miR-142-5p	3.03
miR-106a	2.5	181		miR-10b	2.595	65		miR-148a	3.115	146		miR-31	2.745	337	122.769		miR-135b	2.49	93	37.3494		miR-10b	2.265	178	78.5872			miR-204	1.88	81	43.0851		miR-342	2.18	481	220.642		miR-224	2.125	287	135.059		miR-32	1.885	61	32.3607		miR-146	1.82
miR-17-5p	0.825	172.916		miR-182	0.225	58.1332		miR-106a	2.285	141		miR-106a	2.1	217	103.333		miR-204	2.12	79	37.2642		miR-106a	2.15	141	65.5814			miR-95	0.93	52	55.914		miR-125b	0.815	355	435.583		miR-17-3p	7.035	263	37.3845		miR-23bN	1.35	57	42.2222		miR-18	1.5
miR-10b	2.195	118		miR-17-5p	2.72	53.6538		miR-342	1.71	81		miR-17-5p	2.625	213.336	81.2707		miR-31	2.09	61	29.1866		miR-17-5p	1.67	138.9	83.1735			miR-302b	1.915	41	21.4099		miR-378	2.67	321	120.225		miR-148a	1.52	231	151.974		miR-17-3p	2.215	56	25.2822		miR-182	0.94
miR-149	1.1	89		miR-135b	1.895	37		miR-196b	3.63	79		miR-142-3p	3.095	154	49.7577		miR-34aN	1.005	39	38.806		miR-204	2.335	66	28.2655			miR-17-3p	2.44	33	13.5246		miR-32	1.765	312	176.771		miR-192	2.25	189	84		miR-7	2.055	51	24.8175		miR-34aN	1.305
miR-148a	2.05	85		miR-224	2.515	36		miR-18	4.825	61.2236		miR-149	1.105	124	112.217		miR-148a	2.335	36	15.4176		miR-342	1.995	61	30.5764			miR-92N	2.45	33	13.4694		miR-100	2.035	266	130.713		miR-23bN	1.25	162	129.6		miR-27b	1.35	41	30.3704		miR-17-3p	1.5
miR-18	0.825	64.9372		miR-192	2.065	31		miR-137	2.87	58		miR-342	1.615	111	68.7307		miR-10b	1.985	33	16.6247		miR-148a	3.135	53	16.9059			miR-20N	2.45	32	13.0612		miR-99a	1.775	223	125.634		miR-32	1.99	155	77.8894		miR-378	1.975	31	15.6962		miR-32	1.285
miR-182	-0.035	52.1257		miR-18	2.72	25.2797		miR-149	1.4	36		miR-137	2.085	65	31.1751		miR-342	2.125	26	12.2353		miR-196b	3.125	37	11.84			miR-99a	2.115	29	13.7116		miR-335	2.685	199	74.1155		miR-342	1.34	129	96.2687		miR-135b	2.335	23	9.85011		miR-31	2.065
miR-224	2.105	42		miR-342	1.765	25		miR-182	0.825	17.7259		miR-218	1.54	64	41.5584		miR-137	2.09	23	11.0048		miR-149	1.12	33	29.4643			miR-215	1.745	27	15.4728		miR-27b	0.95	189	198.947		miR-135b	2.985	115	38.526		miR-128a	1.525	17	11.1475		miR-27b	1.125
miR-32	1.745	36		miR-218	2.03	22		miR-7	3.1	11		miR-335	3.02	59	19.5364		miR-18	1.275	22.8861	17.9499		miR-18	1.67	28.4179	17.0167			miR-92	2.45	23	9.38776		miR-23bN	0.95	181	190.526		miR-194	2.37	98	41.3502		miR-31	2.105	13	6.17577		miR-335	2.9
miR-218	1.715	35		miR-422b	1.915	18		miR-135b	2.515	9		miR-148a	2.335	51	21.8415		miR-149	0.96	18	18.75		miR-335	2.455	25	10.1833			miR-196b	1.725	21	12.1739		miR-17-3p	4.85	164	33.8144		miR-27b	1.25	94	75.2		miR-34aN	1.025	11	10.7317		miR-192	3.2
miR-196b	2.45	29		miR-194	1.83	16		miR-32	2.07	9		miR-196b	2.39	51	21.3389		miR-196b	2.63	14	5.32319		miR-34aN	1.39	21	15.1079			miR-194	1.745	18	10.3152		miR-422a	2.28	44	19.2982		miR-218	2.04	47	23.0392		miR-7N	2.055	11	5.3528		miR-194	2.235
miR-34aN	1.25	24		miR-149	0.685	12		miR-422b	2.6	8		miR-204	1.96	47	23.9796		miR-182	0.48	13.139	27.3729		miR-183	1.035	16.5318	15.9727			miR-19a	2.45	17	6.93878		miR-192	2.535	43	16.9625		miR-7	1.265	37	29.249		miR-335	2.99	6	2.00669		miR-422b	2.3
miR-31	0.83	19		miR-196b	2.555	9		miR-7N	3.1	7		miR-18	2.625	35.7311	13.6119		miR-32	2.395	8	3.34029		miR-32	1.66	16	9.63855			miR-192	2.42	17	7.02479		miR-194	1.755	26	14.8148		miR-10b	2.355	34	14.4374		miR-100	2.02	5	2.47525		miR-34a,	1.305
miR-146	2.095	15		miR-137	2.035	8		miR-378	2.6	6		miR-192	2.39	32	13.3891		miR-7	3.305	8	2.42057		miR-192	1.855	15	8.08625			miR-135b	2.325	16	6.88172		miR-182	0.845	24	28.4024		miR-183	1.55	34	21.9355		miR-10b	2.43	5	2.05761		miR-23bN	1.125
miR-422b	2.435	13		miR-32	1.43	6		miR-17-3p	4.825	5.75385		miR-32	1.64	29	17.6829		miR-34a,	1.005	7	6.96517		miR-146	1.725	13	7.53623			miR-34b	2.445	13	5.31697		miR-7	1.93	23	11.9171		miR-185	4.09	23	5.62347		miR-125b	1.845	5	2.71003		miR-7	1.515
miR-194	1.92	9		miR-378	1.915	6		miR-128a	1.415	1		miR-34aN	1.145	27	23.5808		miR-224	1.4	6	4.28571		miR-218	1.415	12	8.48057			miR-10b	1.88	7	3.7234		miR-196b	2.18	11	5.04587		miR-422a	2.295	19	8.27887		miR-129	4.075	5	1.22699		miR-378	2.3
miR-192	2.89	8		miR-7	2.02	5		miR-129	1.215	1		miR-183	1.055	17.6112	16.693		miR-194	1.815	5	2.75482		miR-194	1.815	11	6.06061			miR-128a	2.195	7	3.18907		miR-129	4.285	9	2.10035		miR-96	1.55	18	11.6129		miR-133a	0.485	5	10.3093		miR-183	0.94
miR-135b	2.395	6		miR-128a	1.51	1		miR-133a	0.86	1		miR-224	2.64	15	5.68182		miR-128a	1.535	1	0.651466		miR-96	1.035	8.19872	7.92146			miR-185	2.005	7	3.49127		miR-34aN	0.9	9	10		miR-146	1.865	11	5.89812		miR-137	2.18	5	2.29358		miR-196b	2.155
miR-7	2.36	6		miR-129	2.59	1		miR-142-3p	2.54	1		miR-422b	2.295	14	6.10022		miR-129	1.38	1	0.724638		miR-224	1.76	6	3.40909			miR-100	2.37	1	0.421941		miR-7N	1.93	7	3.62694		miR-7N	1.265	11	8.69565		miR-146	1.735	5	2.88184		miR-96	0.94
miR-34a,	1.25	5		miR-133a	0.77	1		miR-142-5p	2.54	1		miR-146	1.52	13	8.55263		miR-133a	0.705	1	1.41844		miR-128a	1.425	1	0.701754			miR-125b	2.075	1	0.481928		miR-185	2.185	5	2.28833		miR-196b	2.09	8	3.82775		miR-149	1.09	5	4.58716		miR-204	2.19
miR-378	2.435	5		miR-142-3p	4.06	1		miR-146	2.475	1		miR-194	1.84	12	6.52174		miR-142-3p	2.45	1	0.408163		miR-129	1.645	1	0.607903			miR-129	1.595	1	0.626959		miR-10b	2.585	1	0.386847		miR-100	1.885	7	3.71353		miR-183	0.895	5	5.58659		miR-149	0.51
miR-128a	1.185	1		miR-142-5p	4.06	1		miR-183	0.825	1		miR-96	1.055	11.1674	10.5852		miR-142-5p	2.45	1	0.408163		miR-133a	0.82	1	1.21951			miR-133a	0.89	1	1.1236		miR-128a	1.43	1	0.699301		miR-373	1.865	7	3.75335		miR-96	0.895	5	5.58659		miR-185	0.915
miR-129	1.4	1		miR-148a	2.37	1		miR-96	0.825	1		miR-17-3p	2.625	7.35164	2.80063		miR-17-3p	1.275	1	0.784314		miR-137	2.505	1	0.399202			miR-137	1.44	1	0.694444		miR-133a	1.305	1	0.766284		miR-125b	1.07	6	5.60748		miR-185	2.225	5	2.24719		miR-7N	1.515
miR-133a	0.855	1		miR-17-3p	2.72	1		miR-185	1.68	1		miR-34a,	1.145	6	5.24017		miR-183	0.48	1	2.08333		miR-142-3p	2.835	1	0.352734			miR-149	1.05	1	0.952381		miR-135b	2.29	1	0.436681		miR-128a	1.735	1	0.576369		miR-215	1.695	5	2.94985		miR-373	2.065
miR-142-3p	3.165	1		miR-183	0.225	1		miR-192	1.86	1		miR-378	2.295	6	2.61438		miR-96	0.48	1	2.08333		miR-142-5p	2.835	1	0.352734			miR-19b	2.45	1	0.408163		miR-137	1.795	1	0.557103		miR-129	5.59	1	0.178891		miR-196b	1.94	5	2.57732		miR-422a	3.47
miR-142-5p	3.165	1		miR-96	0.225	1		miR-194	1.405	1		miR-128a	1.635	1	0.611621		miR-185	2.035	1	0.4914		miR-17-3p	1.67	1	0.598802			miR-20	2.45	1	0.408163		miR-149	1.11	1	0.900901		miR-133a	0.94	1	1.06383		miR-204	1.75	5	2.85714		miR-135b	2.735
miR-17-3p	0.825	1		miR-185	2.22	1		miR-215	1.405	1		miR-129	2.615	1	0.382409		miR-192	2.255	1	0.443459		miR-185	1.74	1	0.574713			miR-224	3.04	1	0.328947		miR-183	0.845	1	1.18343		miR-137	1.375	1	0.727273		miR-218	2.52	5	1.98413		miR-10b	1.72
miR-183	-0.035	1		miR-215	1.83	1		miR-204	2.015	1		miR-133a	0.82	1	1.21951		miR-215	1.815	1	0.55096		miR-215	1.815	1	0.550964			miR-23bN	0.96	1	1.04167		miR-96	0.845	1	1.18343		miR-149	0.445	1	2.24719		miR-224	1.67	5	2.99401		miR-128a	1.825
miR-96	-0.035	1		miR-204	1.74	1		miR-218	1.885	1		miR-142-5p	3.095	1	0.323102		miR-218	1.64	1	0.609756		miR-302a	1.75	1	0.571429			miR-27b	0.96	1	1.04167		miR-215	1.755	1	0.569801		miR-215	2.37	1	0.421941		miR-302a	2.23	5	2.24215		miR-129	3.43
miR-185	1.515	1		miR-302a	1.735	1		miR-224	2.405	1		miR-185	1.62	1	0.617284		miR-302a	1.52	1	0.657895		miR-302b	1.75	1	0.571429			miR-302c	1.915	1	0.522193		miR-204	2.16	1	0.462963		miR-204	2.155	1	0.464037		miR-302b	2.23	5	2.24215		miR-133a	1.38
miR-215	1.92	1		miR-302b	1.735	1		miR-302a	1.5	1		miR-215	1.84	1	0.543478		miR-302b	1.52	1	0.657895		miR-302c	1.75	1	0.571429			miR-302d	1.915	1	0.522193		miR-218	2.28	1	0.438596		miR-302a	2.045	1	0.488998		miR-302c	2.23	5	2.24215		miR-137	1.31
miR-204	2.3	1		miR-302c	1.735	1		miR-302b	1.5	1		miR-302a	1.745	1	0.573066		miR-302c	1.52	1	0.657895		miR-302d	1.75	1	0.571429			miR-367	1.915	1	0.522193		miR-224	2.22	1	0.45045		miR-302b	2.045	1	0.488998		miR-302d	2.23	5	2.24215		miR-215	2.235
miR-302a	1.63	1		miR-302d	1.735	1		miR-302c	1.5	1		miR-302b	1.745	1	0.573066		miR-302d	1.52	1	0.657895		miR-367	1.75	1	0.571429			miR-31	0.83	1	1.20482		miR-302a	1.98	1	0.505051		miR-302c	2.045	1	0.488998		miR-367	2.23	5	2.24215		miR-218	1.385
miR-302b	1.63	1		miR-367	1.735	1		miR-302d	1.5	1		miR-302c	1.745	1	0.573066		miR-367	1.52	1	0.657895		miR-326	2.065	1	0.484262			miR-32	2.395	1	0.417537		miR-302b	1.98	1	0.505051		miR-302d	2.045	1	0.488998		miR-326	2.715	5	1.84162		miR-224	2.17
miR-302c	1.63	1		miR-326	1.675	1		miR-367	1.5	1		miR-302d	1.745	1	0.573066		miR-326	2.27	1	0.440529		miR-34a,	1.39	1	0.719424			miR-335	2.425	1	0.412371		miR-302c	1.98	1	0.505051		miR-367	2.045	1	0.488998		miR-34a,	1.025	5	4.87805		miR-302a	1.6
miR-302d	1.63	1		miR-335	3.015	1		miR-326	2.045	1		miR-367	1.745	1	0.573066		miR-335	2.905	1	0.344234		miR-34b	0.945	1	1.0582			miR-342	2.895	1	0.345423		miR-302d	1.98	1	0.505051		miR-31	0.0735	1	13.6054		miR-34b	2.41	5	2.07469		miR-302b	1.6
miR-367	1.63	1		miR-34a,	1.13	1		miR-335	1.92	1		miR-326	2.595	1	0.385356		miR-34b	0.715	1	1.3986		miR-372	1.885	1	0.530504			miR-34aN	0.97	1			miR-367	1.98	1	0.505051		miR-326	2.76	1	0.362319		miR-372	2.07	5	2.41546		miR-302c	1.6
miR-326	2.69	1		miR-34aN	1.13	1		miR-34a,	1.14	1		miR-34b	1.135	1	0.881057		miR-372	2.33	1	0.429185		miR-373	1.885	1	0.530504			miR-372	2.05	1	0.487805		miR-31	1.82	1	0.549451		miR-335	3.615	1	0.276625		miR-373	2.07	5	2.41546		miR-302d	1.6
miR-34b	0.875	1		miR-34b	1.19	1		miR-34aN	1.14	1		miR-372	1.65	1	0.606061		miR-373	2.33	1	0.429185		miR-378	2.195	1	0.455581			miR-373	2.05	1	0.487805		miR-326	2.39	1	0.41841		miR-34a,	1.195	1	0.83682		miR-422a	2.13	5	2.34742		miR-367	1.6
miR-372	1.955	1		miR-372	2.51	1		miR-34b	0.67	1		miR-373	1.65	1	0.606061		miR-378	1.485	1	0.673401		miR-422b	2.195	1	0.455581			miR-378	1.765	1	0.566572		miR-34a,	0.9	1	1.11111		miR-34aN	1.195	1	0.83682		miR-95	1.73	5	2.89017		miR-326	3.2
miR-373	1.955	1		miR-373	2.51	1		miR-372	1.485	1		miR-422a	2.645	1	0.378072		miR-422b	1.485	1	0.673401		miR-422a	3.13	1	0.319489			miR-422b	1.765	1	0.566572		miR-34b	2.23	1	0.44843		miR-34b	2.085	1	0.479616		miR-99a	1.79	5	2.7933		miR-342	1.65
miR-422a	1.73	1		miR-422a	2.13	1		miR-373	1.485	1		miR-7	2.575	1	0.38835		miR-422a	1.87	1	0.534759		miR-7	2.465	1	0.40568			miR-422a	1.71	1	0.584795		miR-372	2.37	1	0.421941		miR-372	1.865	1	0.536193		miR-142-3p	3.705	1	0.269906		miR-34b	3.09
miR-7N	2.36	1		miR-7N	2.02	1		miR-422a	2.265	1		miR-7N	2.575	1	0.38835		miR-7N	3.305	1	0.302572		miR-7N	2.465	1	0.40568			miR-7	2.14	1	0.46729		miR-373	2.37	1	0.421941		miR-95	0.985	1	1.01523		miR-20	2.215	1	0.451467		miR-372	2.065
miR-95	0.615	1		miR-95	1.94	1		miR-95	1.255	1		miR-95	1.08	1	0.925926		miR-95	0.885	1	1.12994		miR-95	1.005	1	0.995025			miR-7N	2.14	1	0.46729		miR-95	1.115	1	0.896861		miR-99a	1.725	1	0.57971		miR-92	2.215	1	0.451467		miR-95	0.775
1 The copy number is an extracted population average that is used to identify the SNP copy number in the specific chromosomal regions in which the microRNAs are located. For each cell line the spectral karyotyping data from the ncbi SKY database [Roschke, A.V. et al. Cancer Research 63, 8634-47 (2003) and http://www.ncbi.nlm.nih.gov/sky/skyweb.cgi?formtype=submitters], combined with SNP copy numb…
Supplementary Table 4b: Spearman-Rank analysis to identify significant correlations between the expression level of these 59 microRNAs (RNA copy number) and their corresponding SNP copy number in each of these 27 cell lines
( microRNAs with a p ≤ 0.05 are highlighted )
(Critical value for p=0.05 is 1958)
mircroRNA	Spearman r	SUM	p value
miR-100	-0.299756	4258
miR-106a	-0.0314408	3379
miR-10b	0.0479243	3119
miR-125b	-0.302503	4267
miR-128a	-0.912088	6264
miR-129	-0.439866	4717
miR-133a	-1.08394	6827
miR-135b	-0.0683761	3500
miR-137	-0.233822	4042
miR-142-3p	-0.296398	4247
miR-142-5p	-0.33486	4373
miR-146	-0.508242	4941
miR-148a	-0.302198	4266
miR-149	-0.0735653	3517
miR-17-3p	0.204823	2605
miR-17-5p	0.373932	2051
miR-18	0.163309	2741
miR-182	0.482295	1696	p ≤ 0.05
miR-183	0.163614	2740
miR-185	-0.511294	4951
miR-192	0.425824	1881	p ≤ 0.05
miR-194	-0.143773	3747
miR-196b	0.000610501	3274
miR-19a	0.221306	2551
miR-19b	0.239011	2493
miR-20	-0.00335775	3287
miR-204	-0.174908	3849
miR-20N	0.293346	2315
miR-215	-1.2674	7428
miR-218	-0.325397	4342
miR-224	-0.215201	3981
miR-23bN	-0.282662	4202
miR-27b	-0.209707	3963
miR-302a	-0.53022	5013
miR-302b	-0.53022	5013
miR-302c	-0.630342	5341
miR-302d	-0.630342	5341
miR-31	0.402625	1957	p ≤ 0.05
miR-32	-0.203602	3943
miR-326	-0.702381	5577
miR-335	-0.526557	5001
miR-342	0.322039	2221
miR-34a	-0.132479	3710
miR-34aN	0.0259463	3191
miR-34b	-0.630952	5343
miR-367	-0.630342	5341
miR-372	-1.03785	6676
miR-373	-1.07845	6809
miR-378	0.221612	2550
miR-422a	-0.483822	4861
miR-422b	0.291209	2322
miR-7	-0.28663	4215
miR-7N	-0.53602	5032
miR-92	-0.0631868	3483
miR-92N	0.29823	2299
miR-95	-0.518315	4974
miR-96	0.307387	2269
miR-99a	-0.004884	3292
[truncated: 66 more columns]
